# Supplementary material for: LIFEHOUSE’s Functional Nutrition Examination (Physical Exam, Anthropometrics, and Selected Biomarkers) Informs Personalized Wellness Interventions
Source: MDPI journal article supplement (doi:10.3390/jpm13040594), 2023-03-28
Supplement: s1 [file s1]

## Supplemental Tables

**Supplemental Table S1: Blood Pressure Comparison by Sex, Age, and Occupation**

| <b>Blood Pressure</b>         |                           |                             |                |
|-------------------------------|---------------------------|-----------------------------|----------------|
| <i>Sex Comparison</i>         | <b>Male, % (n)</b>        | <b>Female, % (n)</b>        | <b>p value</b> |
| Blood pressure - Hypertensive | 35 (27)                   | 17 (27)                     | 0.01           |
| Blood pressure - normal       | 59 (44)                   | 71 (112)                    | NS             |
| <i>Age Comparison</i>         | <b>Age 18-35, %, (n)</b>  | <b>&gt;35, % (n)</b>        | <b>p value</b> |
| Blood pressure - hypertensive | 13 (8)                    | 27 (45)                     | 0.05           |
| <i>Occupation Comparison</i>  | <b>Admin/Sales, % (n)</b> | <b>Manufacturing, % (n)</b> | <b>p value</b> |
| Normal                        | 70 (111)                  | 61 (45)                     | 0.01           |
| Blood pressure - Hypertension | 16 (26)                   | 37 (27)                     | 0.001          |

**Supplemental Table S2: Physical Exam Findings for Hair, Skin, Nails Comparison by Sex, Age, and Occupation**

| <b>PE Finding</b>                                |                           |                             |                |
|--------------------------------------------------|---------------------------|-----------------------------|----------------|
| <b>Sex Comparison</b>                            | <b>Male, % (n)</b>        | <b>Female, % (n)</b>        | <b>p value</b> |
|                                                  |                           |                             |                |
| <b>Hair</b>                                      |                           |                             |                |
| Alopecia                                         | 43 (41)                   | 6 (12)                      | ≤0.001         |
| Androgenic alopecia                              | 0 (0)                     | 7 (14)                      | ≤0.01          |
| Normal                                           | 53 (51)                   | 82 (153)                    | ≤0.001         |
| <b>Nails</b>                                     |                           |                             |                |
| Nail Polish/Artificial                           | 3 (1)                     | 40 (23)                     | ≤0.01          |
| Growth, longitudinal or vertical ridging         | 28 (27)                   | 17 (29)                     | ≤0.05          |
| <b>Age Comparison</b>                            | <b>Age 18-35, % (n)</b>   | <b>&gt;35, % (n)</b>        | <b>p value</b> |
| <b>Hair</b>                                      |                           |                             |                |
| Androgenic alopecia                              | 0 (0)                     | 7 (14)                      | ≤0.05          |
| <b>Nails</b>                                     |                           |                             |                |
| Normal shape                                     | 98 (78)                   | 86 (166)                    | ≤0.01          |
| <b>Occupation Comparison</b>                     | <b>Admin/Sales, % (n)</b> | <b>Manufacturing, % (n)</b> | <b>p value</b> |
| <b>Nails</b>                                     |                           |                             |                |
| Brittle                                          | 12 (22)                   | 2 (2)                       | ≤0.05          |
| Growth – Beau’s lines                            | 0 (0)                     | 4 (3)                       | ≤0.05          |
| Growth patterns vertical ridging                 | 27 (50)                   | 8 (6)                       | ≤0.001         |
| Normal Nails                                     | 65 (121)                  | 76 (61)                     | NS             |
| Shape normal                                     | 92 (178)                  | 81 (66)                     | ≤0.05          |
| Texture - brittle nails, weak, thin, bend easily | 5 (10)                    | 0 (0)                       | ≤0.05          |
| <b>Skin</b>                                      |                           |                             |                |
| Texture, seborrhea                               | 4 (9)                     | 0 (0)                       | NS             |

**Supplemental Table S3. Physical Exam Findings for Mouth, Tongue, Teeth, Comparison by Sex, Age, and Occupation**

| PE Finding                       |                           |                             |                |
|----------------------------------|---------------------------|-----------------------------|----------------|
| Comparison by Sex                | Male, % (n)               | Female, % (n)               | p value        |
| <b>Mouth</b>                     |                           |                             |                |
| <b>Gums</b>                      |                           |                             |                |
| Gums - normal                    | 69 (66)                   | 84 (157)                    | ≤0.01          |
| Gums - gingivitis                | 14 (13)                   | 6 (12)                      | NS             |
| Gums - periodontitis             | 8 (8)                     | 2 (5)                       | ≤0.05          |
| <b>Tongue</b>                    |                           |                             |                |
| Tongue fissuring - central       | 28 (26)                   | 17 (32)                     | NS             |
| Tongue shape                     | 69 (65)                   | 59 (110)                    | NS             |
| Tongue scalloping                | 15 (9)                    | 18.9 (21)                   | NS             |
| Tongue coating - white or yellow | 31.6 (19)                 | 30.3 (34)                   | NS             |
| <b>Teeth</b>                     |                           |                             |                |
| Restorations                     | 53 (50)                   | 66 (123)                    | ≤0.05          |
| <b>Comparison by Age</b>         | <b>Age 18-35, % (n)</b>   | <b>&gt;35, % (n)</b>        | <b>p value</b> |
| <b>Gums</b>                      |                           |                             |                |
| Gum line color abnormal          | 11 (9)                    | 21 (41)                     | NS             |
| <b>Mouth</b>                     |                           |                             |                |
| <b>Tongue</b>                    |                           |                             |                |
| Fissuring Lambda                 | 6 (5)                     | 1 (2)                       | ≤0.05          |
| <b>Teeth</b>                     |                           |                             |                |
| Normal                           | 59 (48)                   | 32 (64)                     | ≤0.001         |
| Restorations                     | 44 (36)                   | 69 (137)                    | ≤0.001         |
| Missing teeth                    | 17 (14)                   | 35 (70)                     | ≤0.01          |
| <b>Comparison by Occupation</b>  | <b>Admin/Sales, % (n)</b> | <b>Manufacturing, % (n)</b> | <b>P value</b> |
| <b>Mouth</b>                     |                           |                             |                |
| <b>Jaw</b>                       |                           |                             |                |
| Jaw symmetry                     | 91 (181)                  | 99 (81)                     | ≤0.05          |
| Jaw -TMJ crepitus with opening   | 17 (33)                   | 4 (3)                       | ≤0.01          |
| <b>Hard palate</b>               |                           |                             |                |
| Hard Palate Intact               | 100 (200)                 | 95 (78)                     | ≤0.01          |
| <b>Gums</b>                      |                           |                             |                |
| Gums - normal                    | 83 (166)                  | 70 (57)                     | ≤0.01          |
| Gum line color abnormal          | 25 (50)                   | 0 (0)                       | ≤0.001         |
| Gums - gingivitis                | 5 (9)                     | 20 (16)                     | ≤0.001         |
| Gums - periodontitis             | 1 (1)                     | 15 (12)                     | ≤0.01          |
| <b>Tongue</b>                    |                           |                             |                |
| Tongue color - red               | 6 (12)                    | 14 (11)                     | NS             |
| Tongue shape                     | 51 (102)                  | 90 (73)                     | ≤0.001         |
| Scalloping                       | 20.5 (41)                 | 7.4 (6)                     | ≤0.05          |
| Tongue Size - enlarged           | 15 (29)                   | 5 (4)                       | ≤0.05          |

|                                                           |         |         |        |
|-----------------------------------------------------------|---------|---------|--------|
| Tongue taste bud distribution and prominence - geographic | 3 (5)   | 9 (7)   | ≤0.05  |
| <b>Teeth</b>                                              |         |         |        |
| Normal                                                    | 47 (93) | 23 (19) | ≤0.001 |
| Tooth Decay                                               | 8 (15)  | 24 (20) | ≤0.001 |
| Teeth-Untreated decay                                     | 3 (5)   | 18 (15) | ≤0.001 |
| Teeth painful                                             | 1 (2)   | 12 (10) | ≤0.001 |
| Teeth painful - cracked                                   | 0 (1)   | 6 (5)   | ≤0.01  |
| Restorations - silver/mercury                             | 37 (73) | 51 (42) | ≤0.05  |
| Missing teeth                                             | 21 (42) | 52 (42) | ≤0.001 |
| Teeth - attrition and abrasions                           | 3 (5)   | 13 (11) | ≤0.001 |
| Missing teeth/restorations                                | 49 (98) | 73 (59) | ≤0.001 |

Explanations: Hard palate intact- no cleft palate repair, torus palatinus or other anomalies present.

**Supplemental Table S4. Physical Exam finding for Smell, Taste and Sensory Neurological Exam Comparison by Sex, Age, and Occupation**

|                                                          |                           |                             |                |
|----------------------------------------------------------|---------------------------|-----------------------------|----------------|
| <b>Smell and Taste</b>                                   |                           |                             |                |
| <b>Comparison by Sex</b>                                 | <b>Male, % (n)</b>        | <b>Female, % (n)</b>        | <b>p value</b> |
| <b>Smell</b>                                             |                           |                             |                |
| Smell test; odors: chocolate, strawberry, smoke, leather | 96 (79)                   | 89 (149)                    | NS             |
| Abnormal                                                 | 4 (3)                     | 11 (18)                     | NS             |
| <b>Taste</b>                                             |                           |                             |                |
| Bitter taste - super taster                              | 13 (13)                   | 24 (45)                     | ≤0.01          |
| <b>Light Touch</b>                                       |                           |                             |                |
| Lower extremity monofilament, normal                     | 91 (88)                   | 97 (178)                    | ≤0.05          |
| Lower extremity monofilament, left foot diminished       | 10 (10)                   | 2 (3)                       | ≤0.01          |
| Lower extremity monofilament, right foot diminished      | 7 (7)                     | 1 (2)                       | ≤0.01          |
| <b>Comparison by Age</b>                                 | <b>Age 18-35, % (n)</b>   | <b>&gt;35, % (n)</b>        | <b>p value</b> |
| <b>Taste</b>                                             |                           |                             |                |
| Bitter strip test, no taste                              | 33 (27)                   | 45 (90)                     | NS             |
|                                                          |                           |                             |                |
| <b>Balance</b>                                           |                           |                             |                |
| Left leg eyes closed no balance                          | 12 (10)                   | 27 (52)                     | ≤0.01          |
| Left leg eyes closed balanced                            | 87 (72)                   | 68 (131)                    | ≤0.001         |
| Right leg eyes closed no balance                         | 11 (9)                    | 24 (46)                     | ≤0.05          |
| Right leg eyes closed balanced                           | 88 (70)                   | 74 (143)                    | ≤0.05          |
| <b>Vibratory Sense and Monofilament sensation</b>        |                           |                             |                |
| <b>Lower Extremity</b>                                   |                           |                             |                |
| Normal                                                   | 76 (63)                   | 55 (109)                    | ≤0.01          |
| Left foot diminished vibratory sense                     | 24 (20)                   | 46 (92)                     | ≤0.001         |
| Right foot diminished vibratory sense                    | 24 (20)                   | 46 (91)                     | ≤0.01          |
| Monofilament, diminished                                 | 0 (0)                     | 5 (9)                       | NS             |
| <b>Upper Extremity</b>                                   |                           |                             |                |
| Normal                                                   | 95 (79)                   | 86 (172)                    | ≤0.05          |
| Left hand diminished vibratory sense                     | 5 (4)                     | 13 (26)                     | NS             |
| Right hand diminished vibratory sense                    | 5 (4)                     | 13 (27)                     | ≤0.05          |
|                                                          |                           |                             |                |
| <b>Comparison by Occupation</b>                          | <b>Admin/Sales, % (n)</b> | <b>Manufacturing, % (n)</b> | <b>p value</b> |
| <b>Taste</b>                                             |                           |                             |                |
| Taste: No bitter taste                                   | 37 (72)                   | 55 (45)                     | ≤0.01          |
| Taste: Some bitter taste                                 | 40 (79)                   | 28 (23)                     | NS             |
| Taste: Super bitter taster                               | 25 (45)                   | 16 (13)                     | NS             |

|                                               |          |         |        |
|-----------------------------------------------|----------|---------|--------|
| Tasters: Super and some bitter tasters        | 63 (124) | 44 (36) | ≤0.01  |
| <b>Sensory Exam</b>                           |          |         |        |
| <b>Vibratory sense</b>                        |          |         |        |
| <b><i>Upper Extremity vibratory sense</i></b> |          |         |        |
| Normal                                        | 93 (188) | 77 (63) | ≤0.001 |
| Left hand diminished                          | 5 (11)   | 23 (19) | ≤0.001 |
| Right hand diminished                         | 6 (13)   | 22 (18) | ≤0.001 |
| <b><i>Lower extremity vibratory sense</i></b> |          |         |        |
| Normal                                        | 72 (143) | 35 (29) | ≤0.05  |
| Left foot diminished                          | 29 (57)  | 67 (55) | ≤0.001 |
| Right foot diminished                         | 28 (56)  | 67 (55) | ≤0.001 |
| <b>Light Touch</b>                            |          |         |        |
| <b><i>Upper extremity</i></b>                 |          |         |        |
| Monofilament abnormal left hand               | 0 (0)    | 4 (3)   | ≤0.05  |
| Monofilament abnormal right hand              | 0 (0)    | 2 (2)   | NS     |
